# Supplementary material
Source: PubMed Central journal article supplement (PMC2710643)
Supplement: 0903066106_ST1_PDF.pdf [file 0903066106_ST1_PDF.pdf]

**Table S1**  
**Expression of GAD<sub>67</sub> in Hippocampus of SZs and BDs**

|                                     |           | Fold Change   | P-Value   | Fold Change | P-Value |
|-------------------------------------|-----------|---------------|-----------|-------------|---------|
| <b>Whole Hippocampus Extracts**</b> |           |               |           |             |         |
|                                     | BD vs CON | -1.84         | 0.013     |             |         |
|                                     | SZ vs CON | NC            | NC        |             |         |
| <b>LMD Dissections***</b>           |           |               |           |             |         |
|                                     |           | <b>CA 2/3</b> |           | <b>CA 1</b> |         |
| <b>Stratum Radiatum</b>             | BD vs CON | NC            | NC        | NC          | NC      |
|                                     | SZ vs CON | -2.81         | 0.000051  | NC          | NC      |
| <b>Stratum Pyramidale</b>           | BD vs CON | -2.74         | 0.048     | NC          | NC      |
|                                     | SZ vs CON | -2.94         | 0.038     | NC          | NC      |
| <b>Stratum Oriens</b>               | BD vs CON | -9.59         | 0.0000048 | NC          | NC      |
|                                     | SZ vs CON | -2.81         | 0.000051  | -3.27       | 0.043   |

\*\* From Konradi et al (2004)

\*\*\* From Benes et al (2007)
