# Supplementary material
Source: PubMed Central journal article supplement (PMC2710643)
Supplement: 0903066106_ST2_PDF.pdf [file 0903066106_ST2_PDF.pdf]

# Supplementary Table 2S

## Composite P-Values for GenMapp Biopathway Analyses of Various Gene Clusters

|                                                                      | Stratum Oriens |                |      |           | Stratum Pyramidale |           |          |       | Stratum Radiatum |          |          |       |    |     |          |
|----------------------------------------------------------------------|----------------|----------------|------|-----------|--------------------|-----------|----------|-------|------------------|----------|----------|-------|----|-----|----------|
|                                                                      | N <sub>i</sub> | N <sub>T</sub> | %    | CA3/2     |                    | CA1       |          | CA3/2 |                  | CA1      |          | CA3/2 |    | CA1 |          |
|                                                                      |                |                |      | BD        | SZ                 | BD        | SZ       | BD    | SZ               | BD       | SZ       | BD    | SZ | BD  | SZ       |
| <b>Synaptic Function</b>                                             |                |                |      |           |                    |           |          |       |                  |          |          |       |    |     |          |
| Acetylcholine Synthesis                                              | 0              | 7              | 0    | NC        | NC                 | NC        | NC       | NC    | NC               | NC       | NC       | NC    | NC | NC  | NC       |
| Calcium Channels                                                     | 1              | 28             | 0.04 | NC        | NC                 | NC        | NC       | NC    | NC               | NC       | NC       | NC    | NC | NC  | NC       |
| GPCRDB Class C Metabotropic glutamate pheromone ion channel activity | 3              | 15             | 0.2  | NC        | NC                 | NC        | NC       | NC    | NC               | NC       | NC       | NC    | NC | NC  | NC       |
| Ion channel activity                                                 | 15             | 116            | 0.13 | 4.45E-21  | 3.35E-20           | 5.11E-38  | 2.47E-11 | NC    | NC               | NC       | NC       | NC    | NC | NC  | NC       |
| Monoamine GPCRs                                                      | 0              | 35             | 0    | NC        | NC                 | NC        | NC       | NC    | NC               | NC       | NC       | NC    | NC | NC  | NC       |
| Peptide GPCRs                                                        | 6              | 71             | 0.08 | NC        | NC                 | NC        | NC       | NC    | NC               | NC       | NC       | NC    | NC | NC  | NC       |
| Potassium channel activity                                           | 20             | 132            | 0.13 | 2.05E-37  | 1.86E-29           | 1.93E-42  | 5.73E-14 | NC    | NC               | NC       | NC       | NC    | NC | NC  | NC       |
| Potassium ion transport                                              | 26             | 156            | 0.17 | 9.01E-51  | 2.27E-39           | 7.55E-47  | 6.77E-14 | NC    | NC               | 5.71E-10 | NC       | NC    | NC | NC  | NC       |
| Synaptic transmission                                                | 49             | 241            | 0.2  | 2.64E-87  | 2.74E-54           | 5.61E-91  | 6.39E-22 | NC    | NC               | NC       | NC       | NC    | NC | NC  | NC       |
| Voltage-gated ion channel activity                                   | 24             | 167            | 0.14 | 1.64E-44  | 3.19E-28           | 1.27E-68  | 2.60E-20 | NC    | 7.56E-10         | NC       | NC       | NC    | NC | NC  | NC       |
| <b>Signaling</b>                                                     |                |                |      |           |                    |           |          |       |                  |          |          |       |    |     |          |
| Apoptosis                                                            | 5              | 45             | 0.11 | NC        | NC                 | NC        | NC       | NC    | NC               | NC       | NC       | NC    | NC | NC  | NC       |
| Catecholamine Biosynthesis                                           | 0              | 4              | 0    | NC        | NC                 | 8.27E-99  | NC       | NC    | NC               | NC       | NC       | NC    | NC | NC  | NC       |
| Cell Cycle Regulation                                                | 39             | 187            | 0.21 | 1.79E-81  | 8.27E-67           | 3.31E-92  | 1.43E-22 | NC    | NC               | 1.62E-11 | NC       | NC    | NC | NC  | 3.13E-13 |
| G Protein Signaling                                                  | 15             | 80             | 0.19 | 2.54E-29  | 9.92E-16           | 4.96E-41  | NC       | NC    | NC               | NC       | NC       | NC    | NC | NC  | NC       |
| G13 Signaling Pathway                                                | 3              | 33             | 0.09 | NC        | NC                 | 1.07E-19  | NC       | NC    | NC               | NC       | NC       | NC    | NC | NC  | NC       |
| Glucocorticoid & Mineralocorticoid Metabolism                        | 0              | 12             | 0    | NC        | NC                 | NC        | NC       | NC    | NC               | NC       | NC       | NC    | NC | NC  | NC       |
| Glycogen Metabolism                                                  | 2              | 35             | 0.06 | NC        | NC                 | 1.50E-18  | NC       | NC    | NC               | NC       | NC       | NC    | NC | NC  | NC       |
| Glycolysis and Gluconeogenesis                                       | 7              | 45             | 0.16 | NC        | 6.61E-27           | 8.55E-38  | NC       | NC    | NC               | NC       | NC       | NC    | NC | NC  | NC       |
| MAPK Cascade                                                         | 0              | 30             | 0    | NC        | NC                 | NC        | NC       | NC    | NC               | NC       | NC       | NC    | NC | NC  | NC       |
| S1P Signaling                                                        | 12             | 48             | 0.24 | 1.29E-12  | NC                 | NC        | NC       | NC    | NC               | NC       | NC       | NC    | NC | NC  | NC       |
| Second-messenger-mediated signaling                                  | 34             | 160            | 0.21 | 2.86E-63  | 8.40E-46           | 1.24E-53  | 1.25E-11 | NC    | NC               | NC       | NC       | NC    | NC | NC  | NC       |
| Small ligand GPCRs                                                   | 3              | 16             | 0.19 | NC        | NC                 | NC        | NC       | NC    | NC               | NC       | NC       | NC    | NC | NC  | NC       |
| TGF Beta Signaling Pathway                                           | 18             | 123            | 0.15 | 6.84E-22  | 2.92E-15           | 6.05E-29  | 1.45E-11 | NC    | NC               | NC       | NC       | NC    | NC | NC  | NC       |
| Wnt signaling                                                        | 4              | 72             | 0.06 | 1.04E-10  | 6.92E-10           | 7.98E-26  | NC       | NC    | NC               | NC       | NC       | NC    | NC | NC  | NC       |
| <b>Metabolism</b>                                                    |                |                |      |           |                    |           |          |       |                  |          |          |       |    |     |          |
| Cholesterol Biosynthesis                                             | 4              | 19             | 0.21 | NC        | NC                 | 6.75E-23  | NC       | NC    | NC               | NC       | NC       | NC    | NC | NC  | NC       |
| Electron Transport Chain                                             | 9              | 105            | 0.09 | 3.46E-18  | 1.89E-49           | 3.74E-62  | NC       | NC    | NC               | NC       | NC       | NC    | NC | NC  | 3.47E-36 |
| Inflammatory Response Pathway                                        | 2              | 32             | 0.06 | NC        | NC                 | NC        | NC       | NC    | NC               | NC       | NC       | NC    | NC | NC  | NC       |
| Krebs-TCA Cycle                                                      | 6              | 31             | 0.19 | NC        | 3.87E-11           | 3.91E-29  | NC       | NC    | NC               | NC       | NC       | NC    | NC | NC  | NC       |
| Nucleotide GPCRs                                                     | 2              | 12             | 0.17 | NC        | NC                 | NC        | NC       | NC    | NC               | NC       | NC       | NC    | NC | NC  | NC       |
| Nucleotide Metabolism                                                | 2              | 16             | 0.13 | NC        | NC                 | NC        | NC       | NC    | NC               | NC       | NC       | NC    | NC | NC  | NC       |
| Oxidative Stress                                                     | 5              | 28             | 0.17 | 2.02E-10  | NC                 | 1.90E-11  | NC       | NC    | NC               | NC       | NC       | NC    | NC | NC  | NC       |
| Pentose Phosphate Pathway                                            | 1              | 7              | 0.14 | NC        | NC                 | NC        | NC       | NC    | NC               | NC       | NC       | NC    | NC | NC  | NC       |
| Proteasome Degradation                                               | 4              | 43             | 0.09 | NC        | 4.16E-21           | 8.37E-34  | NC       | NC    | NC               | NC       | NC       | NC    | NC | NC  | NC       |
| Steroid Biosynthesis                                                 | 0              | 35             | 0    | NC        | NC                 | NC        | NC       | NC    | NC               | NC       | NC       | NC    | NC | NC  | NC       |
| <b>Transcription/Translation</b>                                     |                |                |      |           |                    |           |          |       |                  |          |          |       |    |     |          |
| Response to DNA damage stimulus                                      | 39             | 206            | 0.16 | 9.76E-69  | 2.58E-38           | 1.41E-89  | 3.05E-23 | NC    | NC               | NC       | NC       | NC    | NC | NC  | NC       |
| Ribosomal Proteins                                                   | 10             | 88             | 0.11 | 1.83E-17  | 1.15E-13           | 2.57E-58  | NC       | NC    | NC               | NC       | 3.15E-13 | NC    | NC | NC  | NC       |
| Translation Factors                                                  | 14             | 51             | 0.27 | 6.43E-37  | 3.49E-12           | 1.57E-51  | NC       | NC    | NC               | NC       | NC       | NC    | NC | NC  | NC       |
| tRNA Synthetases                                                     | 3              | 21             | 0.14 | NC        | NC                 | 6.36E-23  | NC       | NC    | NC               | NC       | NC       | NC    | NC | NC  | NC       |
| <b>Other</b>                                                         |                |                |      |           |                    |           |          |       |                  |          |          |       |    |     |          |
| Blood Clotting Cascade                                               | 3              | 20             | 0.15 | NC        | NC                 | NC        | NC       | NC    | NC               | NC       | NC       | NC    | NC | NC  | NC       |
| Calcium regulation in cardiac cells                                  | 37             | 149            | 0.25 | 7.23E-67  | 1.15E-72           | NC        | 6.66E-19 | NC    | NC               | 1.03E-14 | NC       | NC    | NC | NC  | 2.04E-27 |
| Heme Biosynthesis                                                    | 3              | 9              | 0.33 | NC        | NC                 | NC        | NC       | NC    | NC               | NC       | NC       | NC    | NC | NC  | NC       |
| Matrix Metalloproteinases                                            | 0              | 0              | 0    | NC        | NC                 | NC        | NC       | NC    | NC               | NC       | NC       | NC    | NC | NC  | NC       |
| Neurogenesis                                                         | 55             | 237            | 0.23 | 1.45E-109 | 1.42E-77           | 1.57E-117 | 4.22E-36 | NC    | NC               | NC       | NC       | NC    | NC | NC  | 4.91E-14 |
| Nuclear Receptors                                                    | 9              | 42             | 0.21 | 4.66E-22  | 3.67E-18           | 8.39E-16  | NC       | NC    | NC               | NC       | NC       | NC    | NC | NC  | NC       |
| Orphan GPCRs                                                         | 4              | 16             | 0.25 | NC        | NC                 | NC        | NC       | NC    | NC               | NC       | NC       | NC    | NC | NC  | NC       |
| Ovarian Infertility Genes                                            | 5              | 31             | 0.16 | 7.17E-11  | NC                 | NC        | NC       | NC    | NC               | NC       | NC       | NC    | NC | NC  | NC       |
| Positive regulation of apoptosis                                     | 26             | 130            | 0.2  | 9.40E-45  | 8.14E-34           | 2.61E-85  | 3.91E-14 | NC    | NC               | NC       | NC       | NC    | NC | NC  | NC       |

For SO of CA3/2 in SZs N<sub>T</sub> = Total number of genes in biopathway/cluster; N<sub>i</sub> = number of genes meeting p = 0.05 inclusionary criterion; % = N<sub>i</sub>/N<sub>T</sub>. The alpha level of significance was Pc = 10<sup>-10</sup>; NC = No Change
