# Supplementary material
Source: PubMed Central journal article supplement (PMC2710643)
Supplement: 0903066106_ST3_PDF.pdf [file 0903066106_ST3_PDF.pdf]

**Table S3**  
**DNA Polymerases**

---

|              |                                                                                         |
|--------------|-----------------------------------------------------------------------------------------|
| <b>POLD</b>  | 3'-5' exonuclease that proof-reads DNA and excises mis-matched nucleotides <sup>1</sup> |
| <b>POLG</b>  | mitochondrial DNA repair <sup>2</sup>                                                   |
| <b>POLH</b>  | p53-activated enzyme that repairs DNA following with UV damage <sup>3</sup>             |
| <b>POLI</b>  | active at targeted breaks <sup>4</sup>                                                  |
| <b>POLL</b>  | nuclear DNA repair in eukaryotic cells <sup>5</sup>                                     |
| <b>APEX1</b> | repair of DNA damage during oxidative stress <sup>6</sup>                               |

---

<sup>1</sup> Shen, Y. et al. (2004) A 21-amino acid peptide from the cysteine cluster II of the family D DNA polymerase from *Pyrococcus horikoshii* stimulates its nuclease activity which is Mre11-like and prefers manganese ion as the cofactor. *Nucleic Acids Res* 32 (1), 158-168.

<sup>2</sup> Hudson, G. and Chinnery, P.F. (2006) Mitochondrial DNA polymerase-gamma and human disease. *Hum Mol Genet* 15 Spec No 2, R244-252.

<sup>3</sup> Flanagan, A.M. et al. (2007) The human POLH gene is not mutated, and is expressed in a cohort of patients with basal or squamous cell carcinoma of the skin. *Int J Mol Med* 19 (4), 589-596

<sup>4</sup> Gearhart, P.J. and Wood, R.D. (2001) Emerging links between hypermutation of antibody genes and DNA polymerases. *Nat Rev Immunol* 1 (3), 187-192

<sup>5</sup> Garcia-Diaz, M. et al. (2000) DNA polymerase lambda (Pol lambda), a novel eukaryotic DNA polymerase with a potential role in meiosis. *J Mol Biol* 301 (4), 851-867

<sup>6</sup> Saitoh, T. et al. (2001) Enhancement of OGG1 protein AP lyase activity by increase of APEX protein. *Mutat Res* 486 (1), 31-40.
