# Supplementary material
Source: PubMed Central journal article supplement (PMC2710643)
Supplement: 0903066106_ST5_PDF.pdf [file 0903066106_ST5_PDF.pdf]

**Table S5**  
**Composite Probabilities for Functional Biopathways**  
**Showing the Most Robust Changes In the Hippocampus of SZs and BDs**

|                                 | <b>Stratum Oriens</b> |            |            |            |
|---------------------------------|-----------------------|------------|------------|------------|
|                                 | <b>CA3/2</b>          |            | <b>CA1</b> |            |
|                                 | <b>SZs</b>            | <b>BDs</b> | <b>SZs</b> | <b>BDs</b> |
| <b>Regulation of cell cycle</b> | 8.27E-67              | 1.79E-81   | 1.43E-22   | 3.31E-92   |
| <b>Neurogenesis</b>             | 1.42E-77              | 1.45E-109  | 4.22E-36   | 1.57E-117  |
| <b>DNA damage response</b>      | 2.58E-38              | 9.76E-69   | 3.05E-23   | 1.41E-89   |
| <b>Synaptic transmission</b>    | 2.74E-54              | 2.64E-87   | 6.39E-22   | 5.61E-91   |

The composite probability  $P_c$  was computed using p-values for individual genes ( $p \leq 0.05$ )

$$\text{Composite Probability, } P_c = \frac{[P_1 \times P_2 \times \dots \times P_i] \times N_p}{(n_r/n_t)} \alpha = 5 \times 10^{-10}$$
