# Supplementary material
Source: PubMed Central journal article supplement (PMC2710643)
Supplement: 0903066106_ST6_PDF.pdf [file 0903066106_ST6_PDF.pdf]

Table S6

**Expression of Nicotinic Cholinergic Receptor Subunits  
In Stratum Oriens of Sectors CA3/2 and CA1**

|              |                      | Schizophrenia |         | Bipolar Disorder     |              |
|--------------|----------------------|---------------|---------|----------------------|--------------|
|              |                      | FC            | P-Value | FC                   | P-Value      |
| <b>CA3/2</b> | Nicotinic 5          | 1.30          | 0.022   | Nicotinic $\alpha$ 3 | -1 .34 0.025 |
|              |                      |               |         | Nicotinic $\alpha$ 7 | -1 .58 0.037 |
|              |                      |               |         | Nicotinic $\delta$   | -1 .23 0.038 |
|              |                      |               |         | Nicotinic $\epsilon$ | -1 .50 0.026 |
| <b>CA1</b>   | Nicotinic $\alpha$ 2 | -1.32         | 0.047   | Nicotinic $\alpha$ 1 | -1 .70 0.019 |
|              | Nicotinic $\delta$   | -1.51         | 0.041   | Nicotinic $\alpha$ 2 | -1 .27 0.008 |
|              |                      |               |         | Nicotinic $\alpha$ 4 | 1 .29 0.030  |
|              |                      |               |         | Nicotinic $\beta$ 3  | -1 .26 0.027 |
|              |                      |               |         | Nicotinic $\gamma$   | -1 .93 0.022 |

Data shown represent the fold change (FC) and P-Value for each gene represented. These data were first reported by Benes et al., 2008.
